# Supplementary material for: Overview of the interactive task in BioCreative V
Source: Oxford University Press journal article supplement (doi:10.1093/database/baw119), 2016-01-01
Supplement: baw119_Supplementary_Data.zip [file baw119_Supplementary_Data.zip]

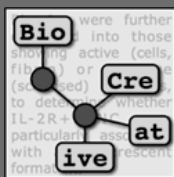

## BioCreative V --- Interactive Task Survey

### Welcome to My Survey

**The information in this survey will be kept anonymous but the data will be used for analysis of usability of the website and that analysis may be published. We may contact you if we have further questions. Your personal information will not be distributed to parties not involved in the evaluation. Please indicate if you agree to these terms by clicking OK:**

\* 1. Please choose:

☐

Disagree with the above terms

☐

OK

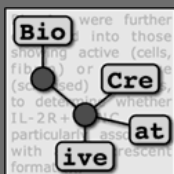

## BioCreative V --- Interactive Task Survey

### Information about you

\* 2. General information

Your name:

Your email:

System assessed:

\* 3. How would you rate your experience level for the biocuration task proposed by the system?

☐

novice to the task (less than one year)

☐

sufficient experience (1-3 years)

☐

expert (more than 3 years)

4. Some system specific question

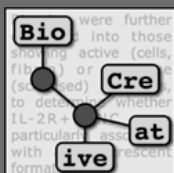

## BioCreative V --- Interactive Task Survey

## Overall reaction

\* 5. Please rate your experience with the system.

☐ very negative    ☐ negative    ☐ neutral    ☐ positive    ☐ very positive

Comments?

\* 6. How would you rate the system?

☐ Poor    ☐ Fair    ☐ Good    ☐ Very good    ☐ Excellent

Please provide comments as needed.

7. How likely is it that you would recommend the system you tried to a friend or colleague?

Not at all likely

Extremely likely

0    1    2    3    4    5    6    7    8    9    10

☐    ☐    ☐    ☐    ☐    ☐    ☐    ☐    ☐    ☐    ☐

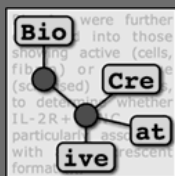

## BioCreative V --- Interactive Task Suvey

## Overall comparison to similar systems

\* 8. Do you know any similar system?

If Yes, please mention which one and how it compares to the one you tested.

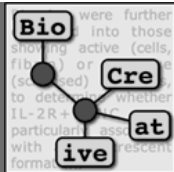

## BioCreative V --- Interactive Task Suvey

### Overall comparison to similar systems

#### 9. System ease of use (compared to similar systems)

- ☐ much harder    ☐ harder    ☐ about the same    ☐ easier    ☐ much easier

Comments?

#### 10. Satisfaction with use (compared to similar systems)

- ☐ very frustrating    ☐ frustrating    ☐ neutral    ☐ satisfying    ☐ very satisfying

Comments?

#### 11. Power to help complete the task (compared to similar systems)

- ☐ completely inadequate    ☐ less powerful    ☐ about the same    ☐ more powerful    ☐ sufficient

Comments?

#### 12. Flexibility in modes of use (compared to similar systems)

- ☐ completely inflexible    ☐ less flexible    ☐ about the same    ☐ more flexible    ☐ highly flexible

Comments?

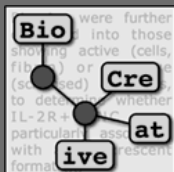

## BioCreative V --- Interactive Task Suvey

### System's ability to help complete tasks

\* 13. Speed: the system decreases the time it takes to reach my curation goal:

☐ strongly disagree ☐ disagree ☐ neutral ☐ agree ☐ strongly agree ☐ NA

Comments?

\* 14. Effectiveness: the system helps me get closer to my curation goal:

☐ strongly disagree ☐ disagree ☐ neutral ☐ agree ☐ strongly agree ☐ NA

Comments?

\* 15. Efficiency: with this system I can be both fast and effective:

☐ strongly disagree ☐ disagree ☐ neutral ☐ agree ☐ strongly agree ☐ NA

Comments?

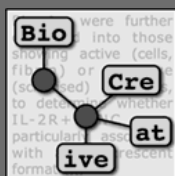

## BioCreative V --- Interactive Task Survey

### Design of application

\* 16. Ease of reading text?

☐ very hard ☐ hard ☐ neutral ☐ easy ☐ very easy ☐ NA

Comments?

\* 17. Use of highlighting:

☐ unhelpful and distracting ☐ unhelpful ☐ not distracting ☐ helpful sometimes ☐ very helpful ☐ NA

Comments?

\* 18. Organization of information:

☐ very confusing   ☐ confusing   ☐ intuitive   ☐ helpful   ☐ very helpful   ☐ NA

Comments?

\* 19. Sequence of screens:

☐ very confusing   ☐ confusing   ☐ intuitive   ☐ helpful   ☐ very helpful   ☐ NA

Comments?

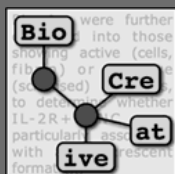

## BioCreative V --- Interactive Task Suvey

### Learning to use the application:

\* 20. Learning to operate application:

☐ very hard   ☐ hard   ☐ neutral   ☐ easy   ☐ very easy   ☐ NA

Comments?

\* 21. Remembering features:

☐ very hard   ☐ hard   ☐ neutral   ☐ easy   ☐ very easy   ☐ NA

Comments?

\* 22. Documentation and help:

☐ very confusing   ☐ confusing   ☐ neutral   ☐ helpful   ☐ very helpful   ☐ NA

Comments?

\* 23. Straightforwardness of use:

☐ hard even after help   ☐ hard   ☐ neutral   ☐ easy after help   ☐ completely intuitive   ☐ NA

Comments?



## BioCreative V --- Interactive Task Suvey

Usability:

\* 24. Speed:

- ☐ very slow    ☐ slow    ☐ acceptable    ☐ fast    ☐ very fast    ☐ NA

Comments?

\* 25. Reliability:

- ☐ very unreliable    ☐ unreliable    ☐ adequate    ☐ reliable    ☐ completely reliable    ☐ NA

Comments?

\* 26. Consistency:

- ☐ very inconsistent    ☐ some inconsistencies    ☐ adequate    ☐ mostly consistent    ☐ completely consistent    ☐ NA

Comments?

\* 27. Ease of correcting mistakes:

- ☐ very hard    ☐ hard    ☐ neutral    ☐ easy    ☐ very easy    ☐ NA

Comments?

\* 28. Error messages:

- ☐ very unhelpful    ☐ unhelpful    ☐ adequate    ☐ helpful    ☐ very helpful    ☐ NA

Comments?

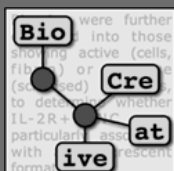

## BioCreative V --- Interactive Task Suvey
